# Supplementary material for: Unexpected diselenide metathesis in selenocysteine-substituted biologically active peptides
Source: Royal Society of Chemistry journal article supplement (doi:10.1039/d4ob00921e), 2024-01-01
Supplement: d4ob00921e1.pdf [file d4ob00921e1.pdf]

□ **Supplementary Information**

**Diselenide metathesis in selenocysteine-substituted biologically active peptides**

**Ying He<sup>1</sup>, Toshiki Takei<sup>1</sup>, Luis Moroder<sup>2</sup>, Hironobu Hojo<sup>1\*</sup>**

<sup>1</sup>Institute for Protein Research, Osaka University, Osaka, Japan

<sup>2</sup>Max-Planck-Institute of Biochemistry, Martinsried, Germany

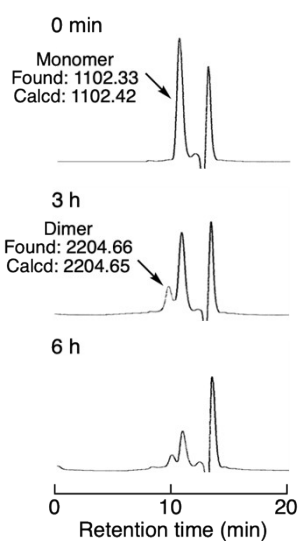

Fig. S1. Elution profiles of size-exclusion chromatography of Se-oxytocin at the concentration of 2 mM. Elution conditions: column, G2500PW<sub>XL</sub> (10 mm x 300 mm, calibration range < 3000 Da, Tosoh, Tokyo) at the flow rate of 0.70 mL/min; temperature, 50 °C; eluent, 50% acetonitrile aq. containing 0.1% TFA.

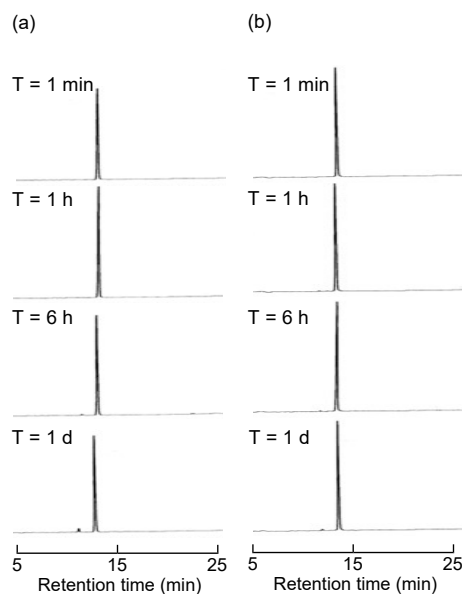

Fig. S2. Stability of native conotoxin at the concentration of (a) 2 mM and (b) 10  $\mu$ M. Elution conditions: column, Mightysil RP-18 GPII (4.6  $\times$  150 mm, Kanto Chemical Co., Inc., Tokyo), eluent, A, 0.1% TFA, B, acetonitrile containing 0.1% TFA. A linear gradient starting from 10% at 0 min to 35% at 25 min.

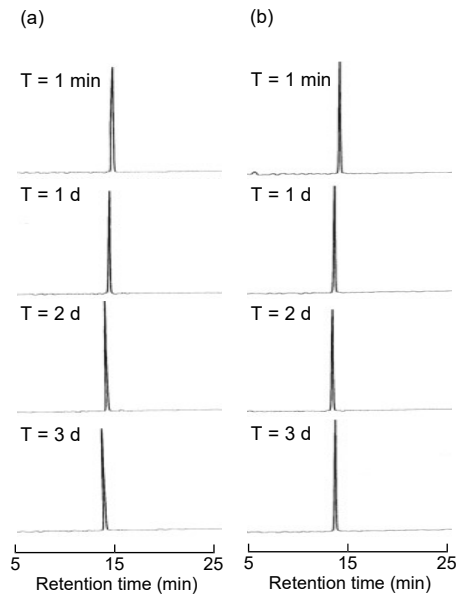

Fig. S3. Stability of native apamin at the concentration of (a) 2 mM and (b) 10  $\mu$ M. Elution conditions: column, Mightysil RP-18 GPII ( $4.6 \times 150$  mm, Kanto Chemical Co., Inc., Tokyo), eluent, A, 0.1% TFA, B, acetonitrile containing 0.1% TFA. A linear gradient starting from 5% at 0 min to 30% at 25 min was applied.
